# Supplementary material
Source: Springer Nature journal article supplement (https://www.springermedizin.de/resource/supplementary/12884_2013_1272_MOESM4_ESM.pdf/9459226)
Supplement: MOESM4 [file 9459226]

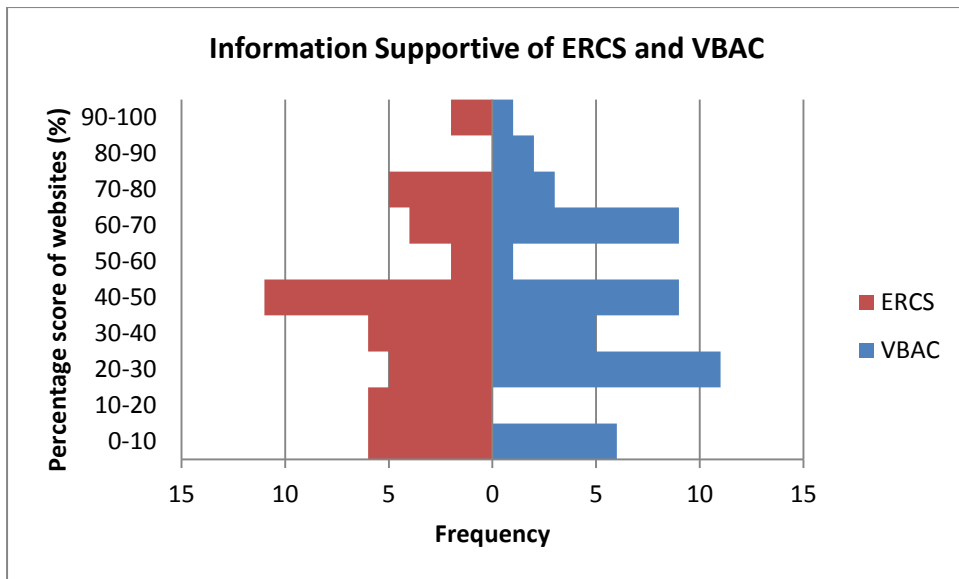

**Figure 3: Website content as a percentage of potential pieces of information in support of each mode of delivery after caesarean birth compared with RCOG document.**
